# Supplementary material for: A super-resolution network using channel attention retention for pathology images
Source: PeerJ Comput Sci. 2023 Jan 17;9:e1196. doi: 10.7717/peerj-cs.1196 (PMC10280234; doi:10.7717/peerj-cs.1196)
Supplement: Supplemental Information 2 — The last column is the result of Table 2 in the paper. The random seeds we used were 1, 7, 11, 18 and 1011. [file peerj-cs-09-1196-s002.xlsx]

## Sheet: Sheet1
seed	1	7	11	18	1011	result
SRCNN 2x	35.502	35.661	35.404	-	-	35.5223
	0.9531	0.9517	0.9496	-	-	0.951467
SRCNN 3x	27.952	28.041	28.07	-	-	28.021
	0.8121	0.8111	0.812	-	-	0.811733
SRCNN 4x	27.499	27.514	27.411	-	-	27.4747
	0.7327	0.7322	0.7339	-	-	0.732933
SRCNN 8x	23.048	23.675	23.744	-	-	23.489
	0.3332	0.3679	0.3861	-	-	0.3624
SRGAN 2x	36.163	36.106	35.724	-	-	35.9977
	0.9721	0.9721	0.975	-	-	0.973067
SRGAN 3x	31.042	31.107	30.822	-	-	30.9903
	0.825	0.8276	0.8206	-	-	0.8244
SRGAN 4x	28.597	28.945	28.276	-	-	28.606
	0.7692	0.7741	0.7724	-	-	0.7719
SRGAN 8x	23.004	24.151	24.033	-	-	23.7293
	0.5484	0.5635	0.562	-	-	0.557967
EDSR 2x	39.656	39.8	39.847	39.402	39.581	39.6572
	0.9701	0.9789	0.9754	0.9682	0.9713	0.97278
EDSR 3x	31.132	31.043	31.335	30.942	31.022	31.0948
	0.877	0.8775	0.881	0.8732	0.8778	0.8773
EDSR 4x	30.016	30.031	29.53	29.828	29.744	29.8298
	0.8055	0.811	0.8069	0.8041	0.8014	0.80578
EDSR 8x	24.334	24.461	24.331	24.391	24.315	24.3664
	0.5684	0.5723	0.5731	0.573	0.5707	0.5715
RDN 2x	40.058	39.925	40.104	40.071	40.132	40.058
	0.9777	0.974	0.9769	0.9762	0.9764	0.97624
RDN 3x	31.208	30.983	31.568	31.244	31.195	31.2396
	0.8815	0.8746	0.882	0.8798	0.8792	0.87942
RDN 4x	30.006	29.879	29.847	29.947	29.885	29.9128
	0.8091	0.8067	0.81	0.8045	0.8069	0.80744
RDN 8x	24.285	24.426	24.438	24.442	24.368	24.3918
	0.5713	0.5714	0.5717	0.5706	0.5706	0.57112
RCAN 2x	40.145	40.107	40.107	40.132	40.231	40.1444
	0.9778	0.9779	0.974	0.9756	0.9769	0.97644
RCAN 3x	31.187	31.234	31.268	31.471	31.261	31.2842
	0.8807	0.88	0.8819	0.8832	0.8802	0.8812
RCAN 4x	29.924	29.84	29.923	29.958	29.935	29.916
	0.8091	0.8091	0.81	0.8066	0.8078	0.80852
RCAN 8x	24.382	24.416	24.423	24.401	24.397	24.4038
	0.5755	0.5743	0.5744	0.5735	0.5767	0.57488
SWD-Net 2x	40.119	40.189	40.187	40.152	40.205	40.1704
	0.9602	0.9651	0.9613	0.9644	0.9687	0.96394
SWD-Net 3x	31.114	31.24	31.234	31.175	31.168	31.1862
	0.8598	0.8617	0.8594	0.8612	0.8631	0.86104
SWD-Net 4x	29.844	29.85	29.852	29.89	29.831	29.8534
	0.8008	0.8001	0.7983	0.7993	0.8013	0.79996
SWD-Net 8x	24.472	24.472	24.478	24.439	24.463	24.4648
	0.5746	0.5746	0.5758	0.5758	0.5766	0.57548
CARN M2x	40.364	40.337	40.382	40.302	40.293	40.3356
	0.9837	0.9839	0.9834	0.9819	0.9794	0.98246
CARN M3x	31.3	31.309	31.276	31.254	31.184	31.2646
	0.899	0.9004	0.8994	0.898	0.8963	0.89862
CARN M4x	29.916	29.963	29.992	29.758	29.809	29.8876
	0.8406	0.8403	0.8422	0.8371	0.8362	0.83928
CARN M8x	24.466	24.461	24.465	24.477	24.393	24.4524
	0.5746	0.5747	0.5739	0.5728	0.5734	0.57388
CARN 2x	40.437	40.313	40.404	40.356	40.281	40.3582
	0.9841	0.9839	0.9836	0.9851	0.9845	0.98424
CARN 3x	31.319	31.277	31.33	31.298	31.284	31.3016
	0.9003	0.8996	0.8998	0.8989	0.8991	0.89954
CARN 4x	29.941	29.978	29.964	29.971	29.966	29.964
	0.8411	0.8404	0.8412	0.8409	0.8405	0.84082
CARN 8x	24.473	24.48	24.483	24.48	24.473	24.4778
	0.5767	0.5759	0.5768	0.5762	0.5761	0.57634
