# Supplementary material for: A super-resolution network using channel attention retention for pathology images
Source: PeerJ Comput Sci. 2023 Jan 17;9:e1196. doi: 10.7717/peerj-cs.1196 (PMC10280234; doi:10.7717/peerj-cs.1196)
Supplement: Supplemental Information 3 — We first explored the combination of L1 and MSE, and then joined SSIM for grid search. And we use these three loss functions to optimize our network independently, and their results can know our search process. [file peerj-cs-09-1196-s003.xlsx]

## Sheet: Sheet1
weight of loss function			PSNR(dB)/SSIM
L1	MSE	SSIM
1	-	-	40.274/0.9701
-	1	-	40.373/0.9826
-	-	1	12.341/0.2475
1	0.3	-	39.803/0.9714
1	0.2	-	39.940/0.9713
1	0.1	-	40.076/0.9698
0.9	0.1	-	40.187/0.9709
0.8	0.2	-	40.202/0.9716
0.7	0.3	-	40.201/0.9730
0.8	0.2	0.2	40.305/0.9822
0.8	0.2	0.1	40.363/0.9827
0.8	0.1	0.2	40.399/0.9828
0.8	0.1	0.1	40.397/0.9843
0.7	0.2	0.1	40.237/0.9810
